# Supplementary material for: Recent progress in translational engineered in vitro models of the central nervous system
Source: PubMed Central journal article supplement — Brain. 2020 Oct 6;143(11):3181–213. doi: 10.1093/brain/awaa268 (PMC7719033; doi:10.1093/brain/awaa268), 2020-10-06
Supplement: awaa268_supplementary_data.pdf [file awaa268_supplementary_data.pdf]

# Supplementary Material

## Recent progress in translational engineered *in vitro* models of the central nervous system

Polyxeni Nikolakopoulou<sup>1\*</sup>, Rossana Rauti<sup>2\*</sup>, Dimitrios Voulgaris<sup>3</sup>, Iftach Shlomy<sup>2</sup>, Ben M. Maoz<sup>2,4,5#</sup> Anna Herland<sup>1,3#</sup>

<sup>1</sup>AIMES, Center for the Advancement of Integrated Medical and Engineering Sciences, Department of Neuroscience, Karolinska Institute, Stockholm, Sweden

<sup>2</sup>Department of Biomedical Engineering, Faculty of Engineering, Tel Aviv University, Tel Aviv, Israel

<sup>3</sup>Division of Micro and Nanosystems, KTH Royal Institute of Technology, Stockholm, Sweden

<sup>4</sup>Sagol School of Neuroscience, Tel Aviv University, Tel Aviv, Israel

<sup>5</sup>The Center for Nanoscience and Nanotechnology, Tel Aviv University, Tel Aviv, Israel

\*These authors contributed equally to the work

#Correspondence to:

Assistant Professor, Ben M. Maoz [bmaoz@tauex.tau.ac.il](mailto:bmaoz@tauex.tau.ac.il)

Associate Professor, Anna Herland, [aherland@kth.se](mailto:aherland@kth.se) +46700877005

# Supplementary Figure 1

A

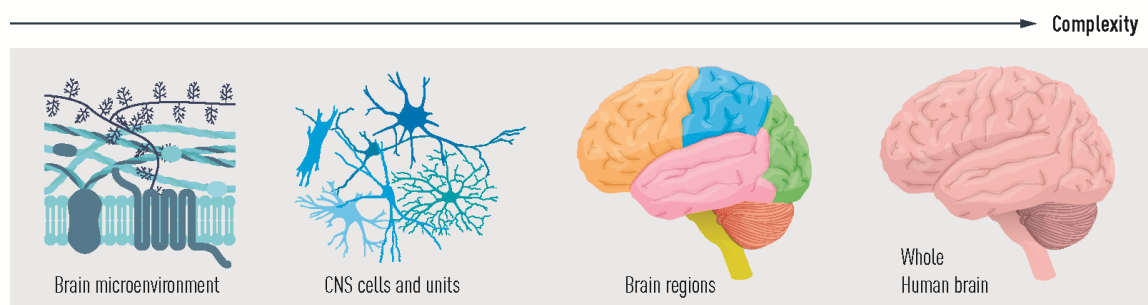

B

|                      |                | Human relevance | Disease models | Systemic effect | Brain regions | Behavior | Electro-physiology | Mechanistic studies | ADME/TOX | HTS | Cost |
|----------------------|----------------|-----------------|----------------|-----------------|---------------|----------|--------------------|---------------------|----------|-----|------|
| Standard 2D cultures | Human primary  | +++             | ++             | -               | ++            | -        | ++                 | ++                  | +        | +   | ++   |
|                      | Human iPSC     | +++             | +++            | -               | ++            | -        | ++                 | +++                 | +        | +++ | +++  |
|                      | Rodent primary | -               | ++             | -               | +++           | -        | +++                | +++                 | +        | +   | ++   |
|                      | Cell lines     | +               | +              | -               | -             | -        | +                  | +++                 | +        | +++ | ++   |
| Organoids            | Human primary  | +++             | +++            | -               | ++            | -        | -                  | ++                  | -        | -   | ++   |
|                      | Human iPSC     | +++             | +++            | -               | +             | -        | +                  | ++                  | +        | ++  | ++   |
|                      | Rodent primary | -               | +              | -               | +++           | -        | +                  | ++                  | -        | -   | ++   |
|                      | Cell lines     | +               | +              | -               | -             | -        | +                  | ++                  | -        | ++  | +    |
| Organs on a chip     | Human primary  | +++             | ++             | ++              | ++            | -        | ++                 | ++                  | ++       | -   | ++   |
|                      | Human iPSC     | +++             | +++            | ++              | ++            | -        | ++                 | +++                 | ++       | -   | ++   |
|                      | Rodent primary | -               | ++             | ++              | +++           | -        | +++                | +++                 | +        | -   | +    |
|                      | Cell lines     | +               | +              | ++              | -             | -        | +                  | +++                 | ++       | -   | +    |
|                      | Rodent in vivo | -               | ++             | +++             | +++           | +++      | ++                 | +                   | ++       | -   | +++  |

**Supplementary Figure 1: Modeling the complexity of the human CNS.** A) The neural tissue is characterized by an immense cytoarchitectural complexity, illustrated in levels from left to right. The unique brain microenvironment, the vivid interplay among specialized neural cells, and the distinct regional characteristics are instrumental for brain functionality in health and disease. B) In CNS research, when attempting to create translatable models of the human brain, it is critical to reproduce the brain's unique functions, regions, and pathophysiology. Here, we have made an overviewing comparison of rodent *in vivo* models (the most commonly used mammal), standard two-dimensional (2D) cell culture models, organoid cultures and Organs-on-a-Chip (OoC) for their human specificity and their capacity to model human diseases, systemic effects, brain regionality, behavior, drug absorption, distribution, metabolism and excretion, and toxicity (ADME-Tox). We also rate the possibility for electrophysiological studies, detailed mechanistic studies, high throughput studies (HTS), and the cost of the model. For the three *in vitro* models, we divided them into the accessible cell sources, human primary cells, rodent primary cell and hiPCS, and cell lines. Notably, we want to emphasize that human primary cells from the CNS are scarce. We further wish to highlight that this rating, the appropriateness of each model, varies for each specific study, and our rating should be used as a general guideline of what is possible to achieve with each model.

| Model                                            | Refs                                                                                                                                                                            | Shear stress | Cell-cell interactions                                                                | High through put / Cost                             | Similarity to human physiology                                                                       | Graphical representation <sup>1</sup>                                                |
|--------------------------------------------------|---------------------------------------------------------------------------------------------------------------------------------------------------------------------------------|--------------|---------------------------------------------------------------------------------------|-----------------------------------------------------|------------------------------------------------------------------------------------------------------|--------------------------------------------------------------------------------------|
| TW <sup>2</sup>                                  | (Zenker <i>et al.</i> , 2003; Colgan <i>et al.</i> , 2008; Helms <i>et al.</i> , 2014; Labus <i>et al.</i> , 2014; Canfield <i>et al.</i> , 2017; Delsing <i>et al.</i> , 2018) | No           | Co-culturing possible, tri-culturing more challenging to evaluate cell populations    | Yes / Low                                           | Minimal, ECM present only as anchoring points, 2D geometry                                           | 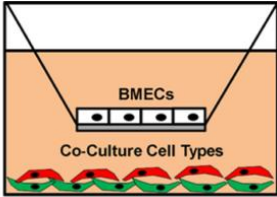  |
| Porous-tube models                               | (Neuhaus <i>et al.</i> , 2006; Cucullo <i>et al.</i> , 2008; Marino <i>et al.</i> , 2018; Moya <i>et al.</i> , 2020)                                                            | Yes          | Same as TW                                                                            | Minimal / Moderate                                  | Improved similarity to human physiology (shear stress, 3D luminal geometry), but minimal ECM present |   |
| Microfluidic chips (membrane-based) <sup>3</sup> | (Booth and Kim, 2012; Prabhakarpan dian <i>et al.</i> , 2013; Achyuta <i>et al.</i> , 2013; Wang <i>et al.</i> , 2017; Maoz <i>et al.</i> , 2018)                               | Yes          | Capability of compartmentalization and studying interactions between cell populations | Yes, however more time consuming than TW / Moderate | Same as porous-tube models                                                                           |  |

|                                              |                                                                                                                                                    |            |                                                  |                                                            |                                                                                       |                                                                                     |
|----------------------------------------------|----------------------------------------------------------------------------------------------------------------------------------------------------|------------|--------------------------------------------------|------------------------------------------------------------|---------------------------------------------------------------------------------------|-------------------------------------------------------------------------------------|
| <p><b>Microfluidic chips (ECM-based)</b></p> | <p>(Brown <i>et al.</i>, 2015; Herland <i>et al.</i>, 2016, Xu <i>et al.</i>, 2016a; Adriani <i>et al.</i>, 2017; Partyka <i>et al.</i>, 2017)</p> | <p>Yes</p> | <p>Same as membrane-based microfluidic chips</p> | <p>Yes, however more time consuming than TW / Moderate</p> | <p>Utmost attempt at in vitro biomimicry (shear stress, 3D geometry, ECM present)</p> | 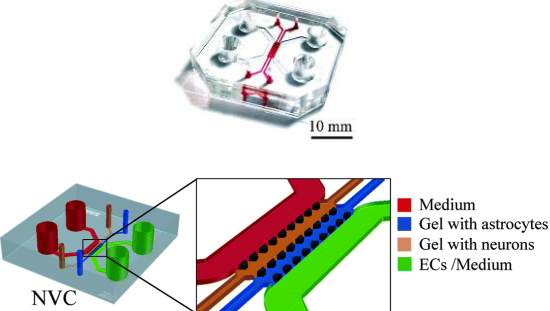 |
|----------------------------------------------|----------------------------------------------------------------------------------------------------------------------------------------------------|------------|--------------------------------------------------|------------------------------------------------------------|---------------------------------------------------------------------------------------|-------------------------------------------------------------------------------------|

## Supplementary Figure 2: Summary of *in vitro* models commonly used in BBB research

TW: Transwell; ECM: extracellular matrix; 2D: 2 dimensions; 3D: 3 dimensions; BMECs: brain microvasculature endothelial cells; PDMS: Polydimethylsiloxane; NVC: Neurovascular chip

### Porous-tube models

- Graphical representation of a microcapillary-mimicking porous tube that enables exchange with the external environment
- Top view of porous tubes, many tubes can run in parallel.

### Microfluidic chips (membrane-based)

- A simplified graphical representation of the NVU
- A linked NVU-on-Chip. hBMECs (magenta) are cultured with brain astrocytes (blue) and pericytes (yellow) in the top compartment of the chips; human brain neuronal cells (green) and astrocytes (blue) are cultured in the lower compartment.

<sup>1</sup>TW model reprinted with permission from (Canfield *et al.*, 2017); microfluidic chip model (membrane-based) reprinted with reuse permission from the original work of the corresponding authors from (Maoz *et al.*, 2018); porous-tube model model reprinted with permission from (Marino *et al.*, 2018); microfluidic model (ECM-based) reprinted with permission from (Adriani *et al.*, 2017);

<sup>2</sup>In this list, we consider studies that use TW in static cultures, there are, however, studies that implement flow in TW (Hinkel *et al.*, 2019).

<sup>3</sup>In this list, microfluidic chips with a temporary membrane (i.e. a membrane that degrades over time) are not included, such as the work of (Tibbe *et al.*, 2018).

## Developer

## Engineered Devices

## Application Examples

## Strength and Limitations

**MIMETAS**  
the organ-on-a-chip company

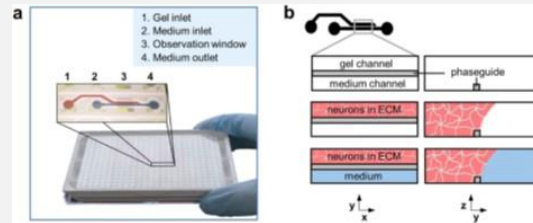

In (a) Schematic representation of an OrganoPlate, made of 96 microfluidic chips. In (b) experimental sketch for culturing 3D neuronal-glia networks mixed with ECM (From Wevers et al., 2016)

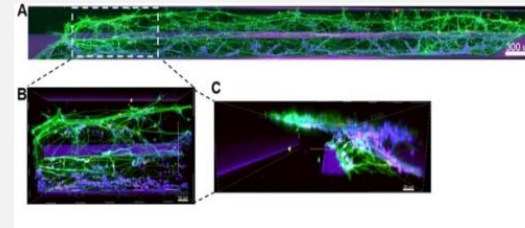

Confocal reconstructions of stem cell-derived dopaminergic neurons grown inside the OrganoPlate device (from Kane et al., 2019).

Cell can be embedded within the hydrogel, resembling the parenchymal space  
Cells can be coated on the hydrogel surface to mimic the vascular interface  
Versatile  
Possibility to grow 3D-culture system  
Highly compact and higher-throughput than competitors  
**Only operational with bi-directional flow**

**emulate**

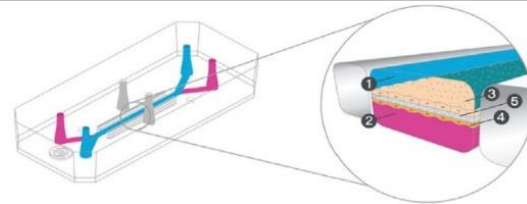

Schematic representation of dual-channel microfluidic chip. In the cross-section note the possibility to grow distinct cultures, separated by a porous membrane (from Sances et al., 2018).

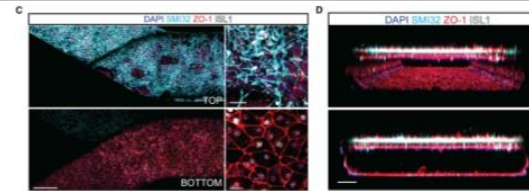

Confocal reconstructions of iPSC-derived motor neurons co-cultured with brain microvascular endothelial cells (from Sances et al., 2018).

Presence of two microfluidic channels with the possibility to culture two different types of cells  
Possibility to modulate and mimic various tissue specific fluid conditions  
**Made of PDMS**  
**Cell-to-liquid ratio**  
**Surface-to-volume ratio**  
**Thickness of the membrane does not match the thickness of the basement membrane**  
**Not easily adapted to high-throughput assays**

**TISSUSE**  
Emulating Human Biology

The microfluidic four-organ-chip, designed to host intestinal, liver, renal and brain cultures, mimicking the in vivo situation (from Ramme et al., 2019).

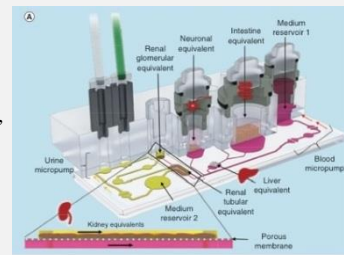

Immunostaining of the induced pluripotent stem cell-derived liver, intestinal, renal and neuronal cultures grown in the four-organ chip (from Ramme et al., 2019).

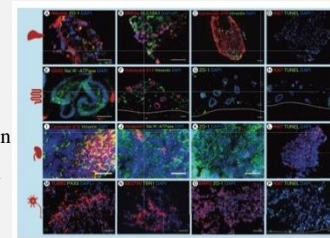

Built-in micropump driven by an external pneumatic controller  
Constructed of thermoplastic while PDMS is restricted to a thin membrane  
Open tissue chamber and separated from the fluid channels  
Possibility to combine with different tissue assembly method  
**Tissue volume scaling**  
**Cell-to-liquid ratio**

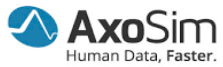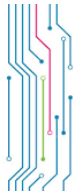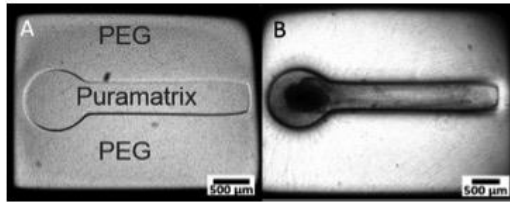

The microengineered nerve-on-a-chip device enabling the growth of parallel neural fibers bundles for physiological testing (from Huval et al., 2015).

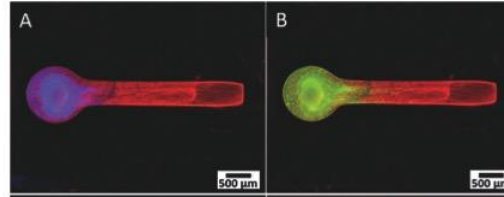

Fluorescent reconstructions of neuronal fibers growth and migration immunostained for  $\beta$ -tubulin III (red) and glial cells (green). Nuclei are visualized by DAPI (blue) (from Huval et al., 2015).

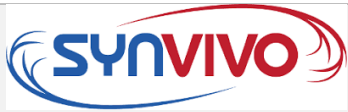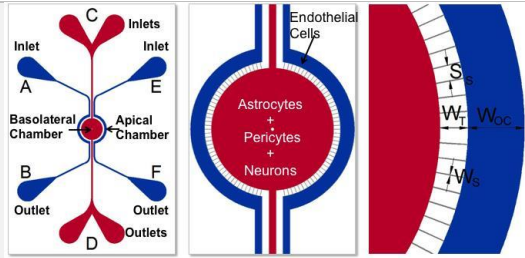

Scheme of the BBB model, displaying the apical chamber (vascular tissue) and the basolateral chamber (brain tissue cells). Porous architecture enables communication between the vascular and brain tissue).

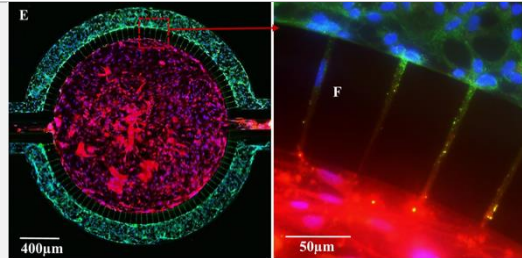

CD-31 (green) stained endothelial cells and GFAP (red) stained astrocytes forming tight cells junctions in the SynBBB device (from Deosarkar et al., 2015)

Not easily adapted to high-throughput assays

Ideal for clinical nerve compound action potential (CAP) and nerve fiber density (NFD) tests

3D in vitro system

Successfully adapted for electrophysiological recordings

Only tested on rat tissue explants

Not easily adapted to high-throughput assays

Possibility to maintain and image the micro-vessel for long periods of time

Tissue compartment and microvascular channels that mimic the 3D-morphology of in vivo microvessels

Porous interface that replace the use of membranes

Size of the micro-channels

Not easily adapted to high-throughput assays



|                                                                                  |                                                                                                                                                                                                                                                            |                                                                                                                                                                                                                                         |                                                                                                                                                                                                                                                                                    |
|----------------------------------------------------------------------------------|------------------------------------------------------------------------------------------------------------------------------------------------------------------------------------------------------------------------------------------------------------|-----------------------------------------------------------------------------------------------------------------------------------------------------------------------------------------------------------------------------------------|------------------------------------------------------------------------------------------------------------------------------------------------------------------------------------------------------------------------------------------------------------------------------------|
|  |  <p>Sketch of the multicompartment microfluidic chip, showing the channels and the microgrooves separating the channels (from Paranjape et al., 2019)</p>                 |  <p>Neuron extending axons through the microgrooves of the chip and into an isolated axon compartment (from Paranjape et al., 2019)</p>               | <p>Made of cyclic olefin copolymer<br/>         No autofluorescent<br/>         Ideal hydrophilic surface for attachment and growth of stem cells<br/>         Possibility of co-cultures<br/> <b>Gas impermeable</b><br/> <b>Not easily adapted to high-throughput assays</b></p> |
|  |  <p>The Neuro Device used to pattern neurons and direct axonal extension. It enables growth of 100 axons with more than 1 mm in length (from Magdesian et al., 2016).</p> |  <p>Neurons cultured in the PDMS Neuro Device, enabling the growth of axons and dendrites inside the microchannels (from Magdesian et al., 2016).</p> | <p>Possibility to be removed any time for direct manipulation of neurons<br/>         Good for axonal extension measurements<br/>         Possibility of co-cultures<br/> <b>Made of PDMS</b><br/> <b>Not easily adapted to high-throughput assays</b></p>                         |

**Supplementary Figure 3: Commercial OoC or chip providers.** Overview on commercial microfluidic chip providers, with a description and application of their device for brain application studies.
